# Supplementary material for: Curcumin liposomes interfere with quorum sensing system of Aeromonas sobria and in silico analysis
Source: PubMed Central journal article supplement (PMC5561023; doi:10.1038/s41598-017-08986-9), 2017-08-17
Supplement: 41598_2017_8986_MOESM1_ESM.pdf [file 41598_2017_8986_MOESM1_ESM.pdf]

**Curcumin liposomes interfere with quorum sensing system of *Aeromonas sobria* and in**

***silico* analysis**

**Ting Ding<sup>a, c</sup>, Tingting Li<sup>b</sup>, Zhi Wang<sup>d</sup>, Jianrong Li<sup>c, a\*</sup>**

**Fig.S1** Particle size (a) and zeta potential (b) of curcumin liposomes

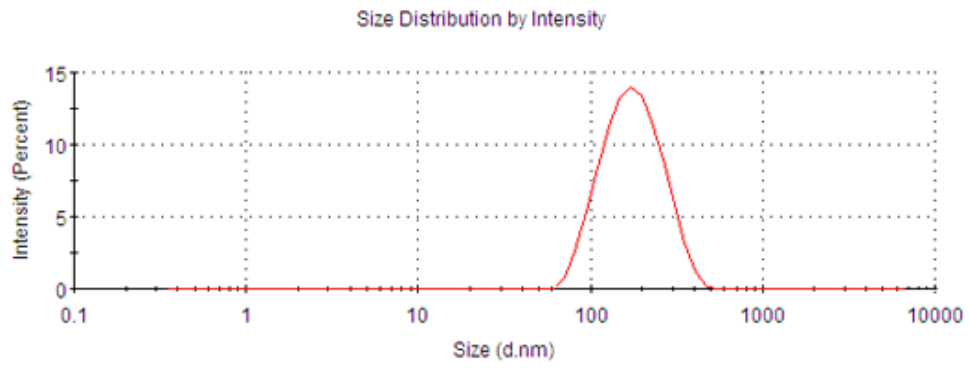

(a)

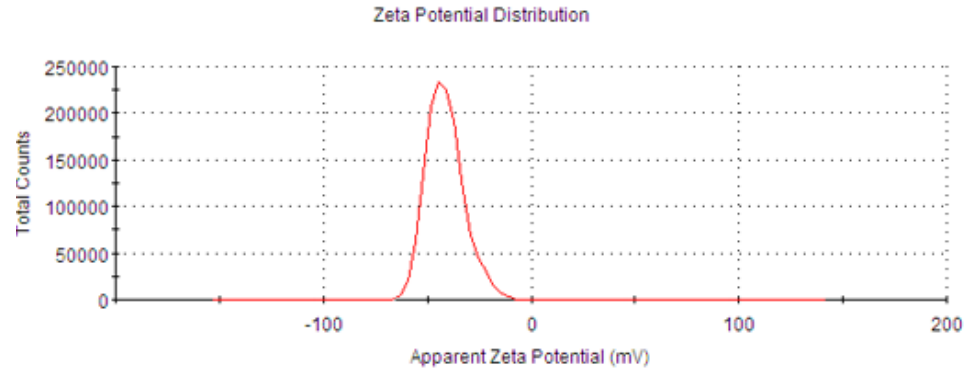

(b)

**Fig. S2** Effects of curcumin liposomes and free curcumin on AHLs production of *A. sobria*

(A) Typical GC-MS chromatogram of standard AHLs (B) GC-MS chromatogram of AHLs of *A. sobria* (C) GC-MS chromatogram of AHLs of *A. sobria* treated with free curcumin (D) GC-MS chromatogram of AHLs of *A. sobria* treated with curcumin liposomes

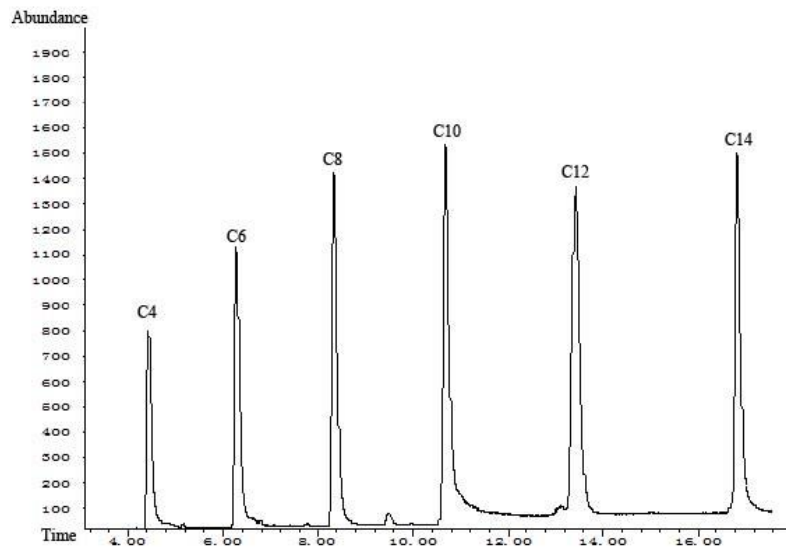

(A)

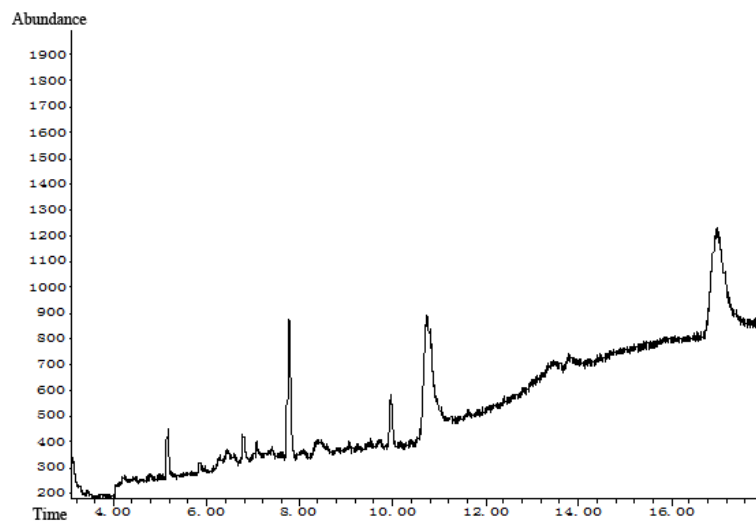

(B)

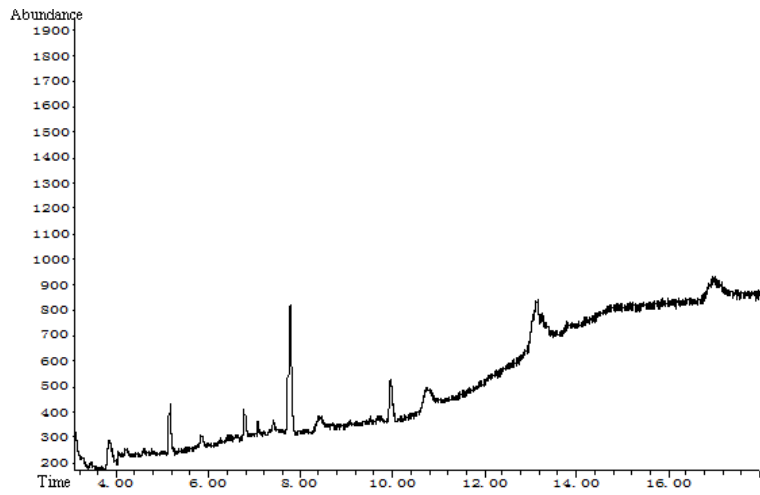

(C)

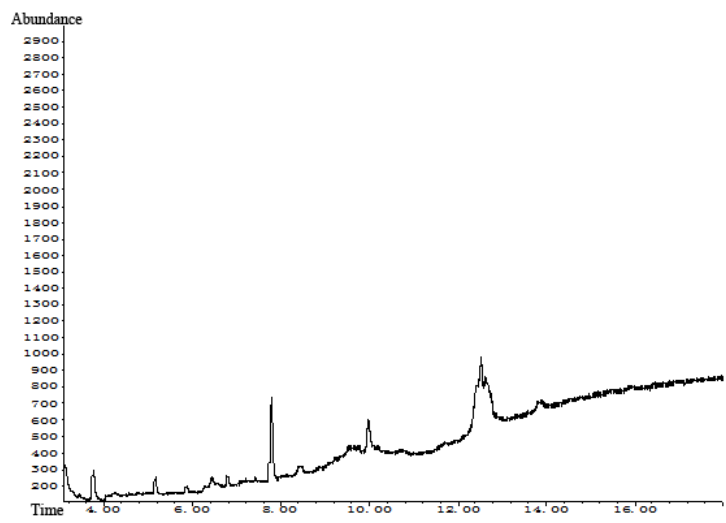

(D)
